# Supplementary material for: Engineering carrier scattering at the interfaces in polyaniline based nanocomposites for high thermoelectric performances
Source: Royal Society of Chemistry journal article supplement (doi:10.1039/c6qm00188b), 2016-11-01
Supplement: c6qm00188b1.pdf [file c6qm00188b1.pdf]

## Electronic Supplementary Information

### **Engineering the carrier scattering at the interfaces in polyaniline based nanocomposites for high thermoelectric performance**

Liming Wang,<sup>abc</sup> Qin Yao,<sup>\*ab</sup> Wei Shi,<sup>abc</sup> Sanyin Qu,<sup>ab</sup> and Lidong Chen<sup>\*abd</sup>

<sup>a</sup> *State Key Laboratory of High Performance Ceramics and Superfine Microstructure, Shanghai Institute of Ceramics, Chinese Academy of Sciences, Shanghai 200050, China*

<sup>b</sup> *CAS Key Laboratory of Materials for Energy Conversion, Shanghai Institute of Ceramics, Chinese Academy of Sciences, Shanghai 200050, China*

<sup>c</sup> *University of Chinese Academy of Sciences, Beijing 100049, China*

<sup>d</sup> *Shanghai Institute of Materials Genome, Shanghai 200050, China*

<sup>\*</sup> Corresponding author.

Email address: yaoqin@mail.sic.ac.cn, cld@mail.sic.ac.cn.

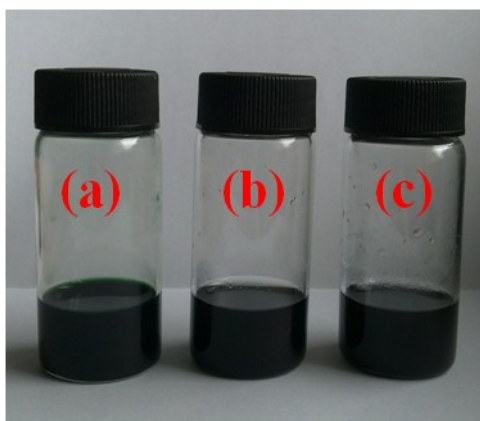

**Fig. S1** Digital photograph of synthesized samples placed after a week: (a) 10 mg mL<sup>-1</sup> solution of PANI, (b) 10 mg mL<sup>-1</sup> solution of PANI/SWNTs, and (c) 10 mg mL<sup>-1</sup> solution of PANI/SWNTs/Te. All samples show good water-solubility.

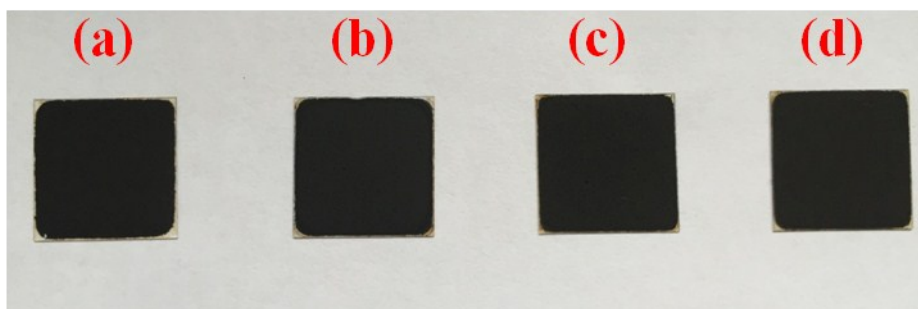

**Fig. S2** Digital photograph of prepared PANI/SWNTs/Te nanocomposite films with (a) 4 wt% Te content, (b) 10 wt% Te content, (c) 30 wt% Te content, and (d) 50 wt% Te content.

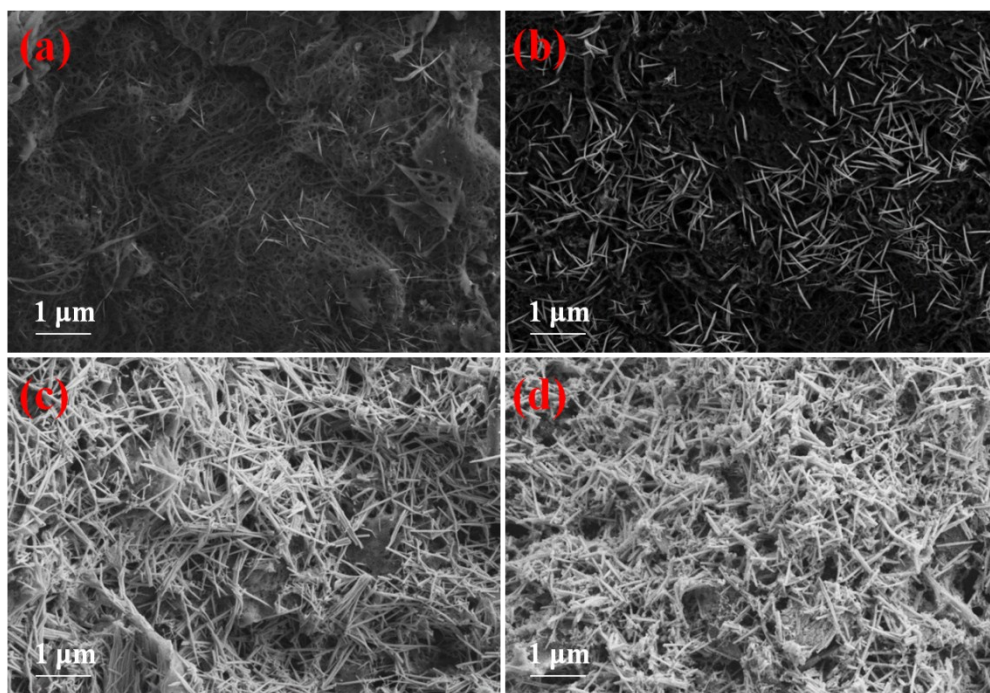

**Fig. S3** SEM images of (a) PANI/SWNTs/Te nanocomposite film with 4 wt% Te content, (b) PANI/SWNTs/Te nanocomposite film with 10 wt% Te content, (c) PANI/SWNTs/Te nanocomposite film with 30 wt% Te content, and (d) PANI/SWNTs/Te nanocomposite film with 50 wt% Te content.

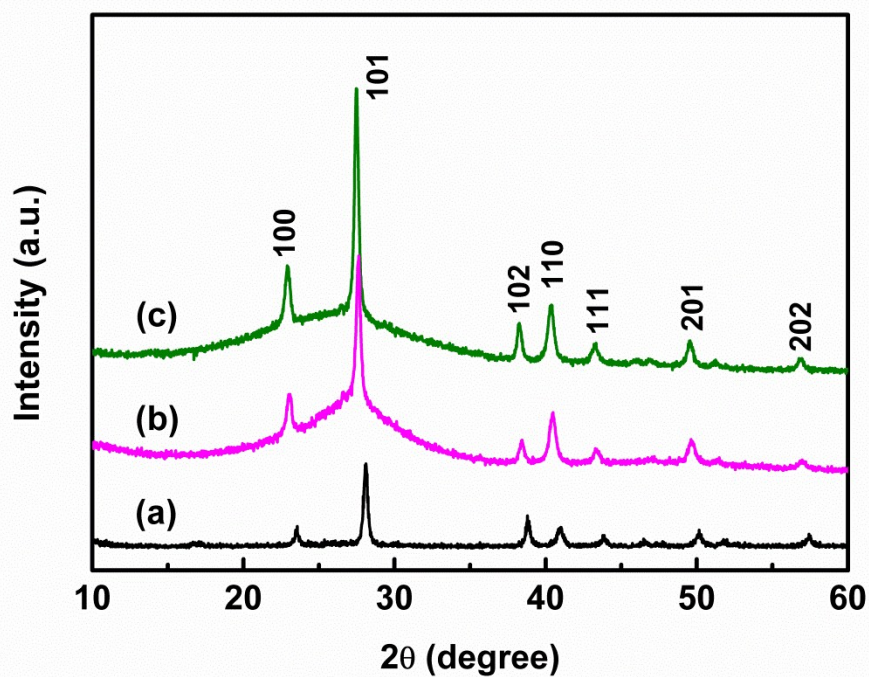

**Fig. S4** XRD patterns of (a) PANI/SWNTs/Te nanocomposite film with 10 wt% Te content, (b) PANI/SWNTs/Te nanocomposite film with 30 wt% Te content, (c) PANI/SWNTs/Te nanocomposite film with 50 wt% Te content.

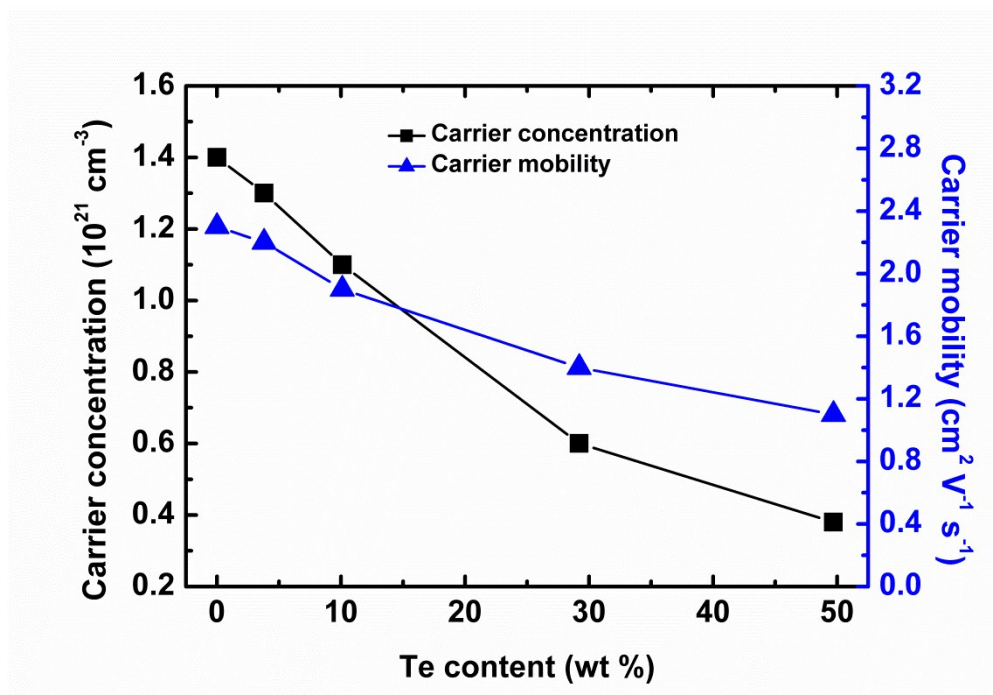

**Fig. S5** Carrier concentration and carrier mobility of PANI/SWNTs/Te nanocomposite films with different Te content.

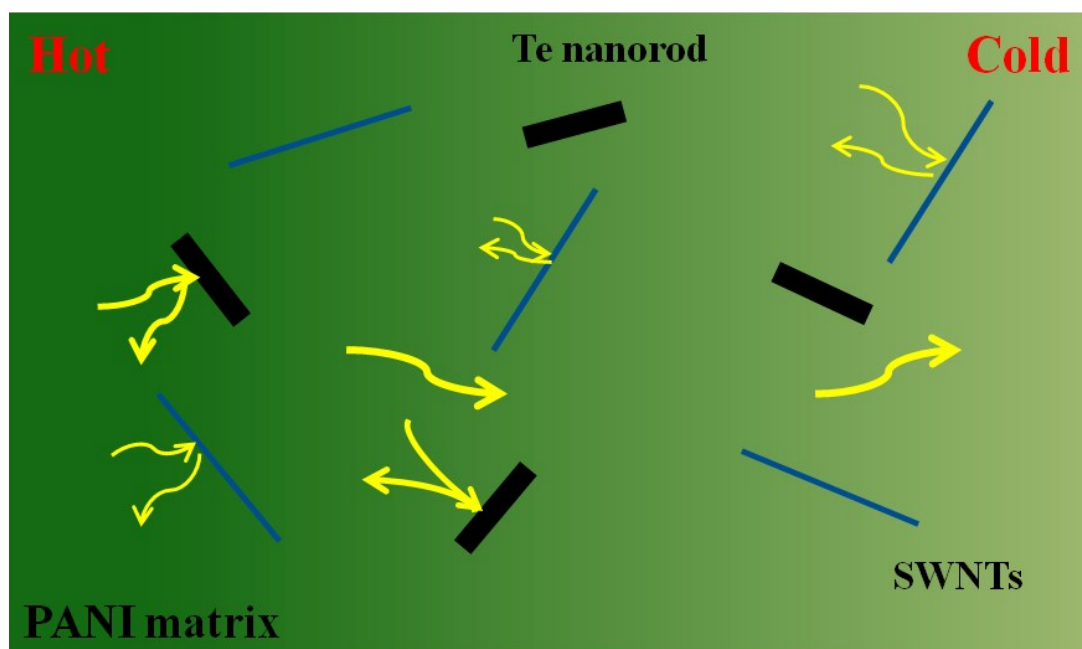

**Fig. S6** Schematic diagram of the phonon scattering effect in PANI/SWNTs/Te nanocomposites.

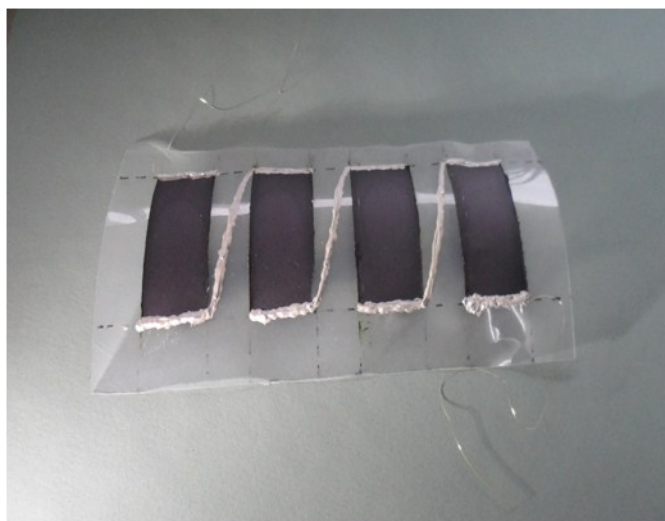

**Fig. S7** Digital photograph of flexible thermoelectric module fabricated by PANI/SWNTs/Te nanocomposite films with 10 wt% Te content.
